# Supplementary material for: Environmental Enrichment for Rainbow Trout Fingerlings: A Case Study Using Shelters in an Organic Trout Farm
Source: MDPI journal article supplement (doi:10.3390/ani13020268), 2023-01-12

Supplementary Figure S1. Illustrative summary of the process of image analysis described in section 2.8.

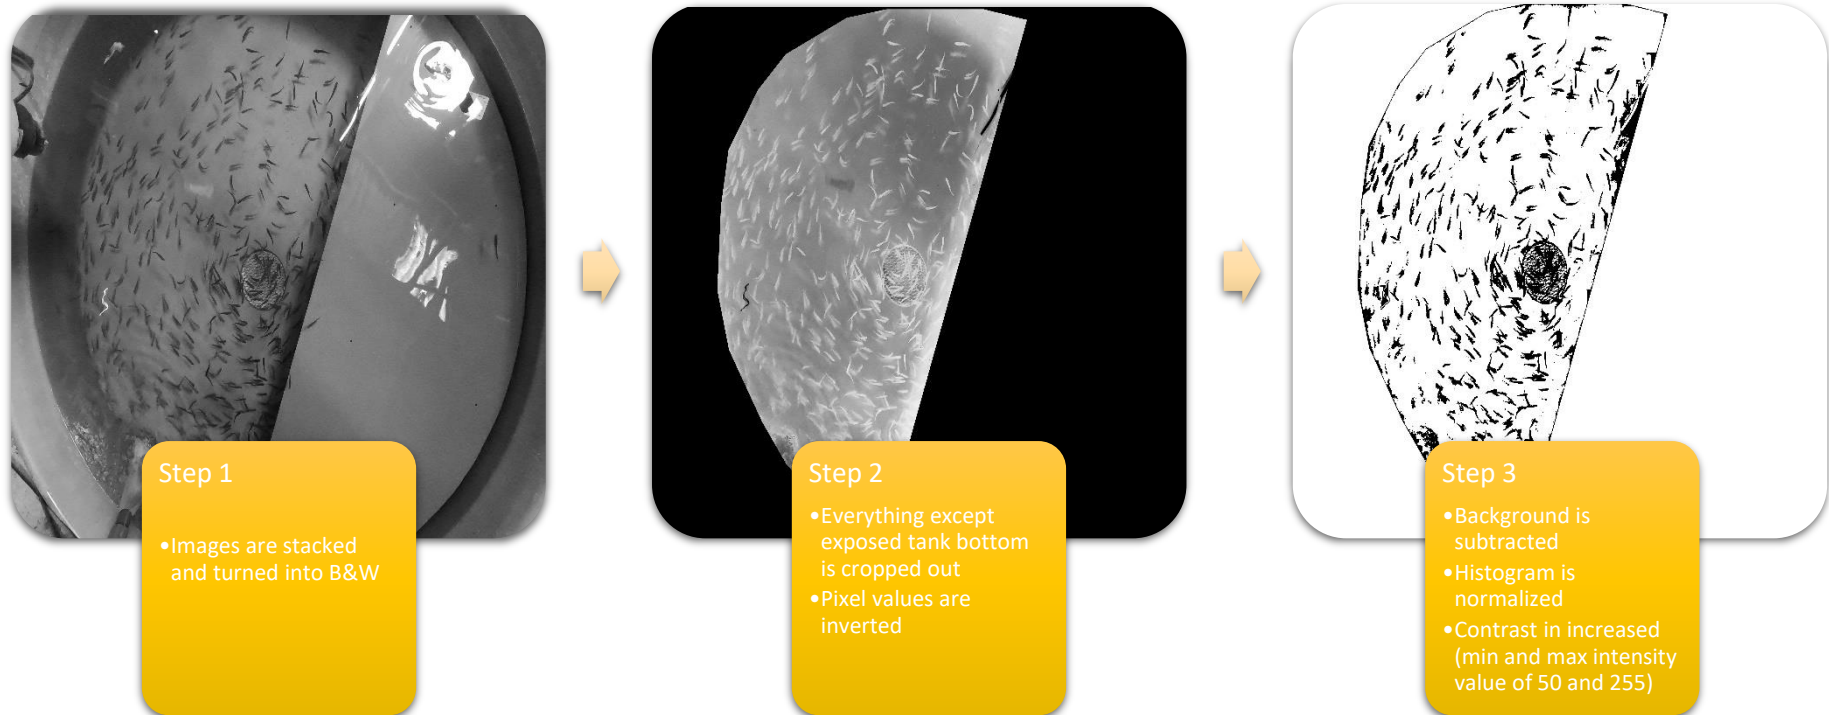

Supplement: s1 [file s1]
